# Supplementary material
Source: PubMed Central journal article supplement (PMC5459399)
Supplement: NIHMS829114-supplement-FINAL_PRODUCTION_FILE__SDC_1.pdf [file NIHMS829114-supplement-FINAL_PRODUCTION_FILE__SDC_1.pdf]

Supplemental Digital Content 1.

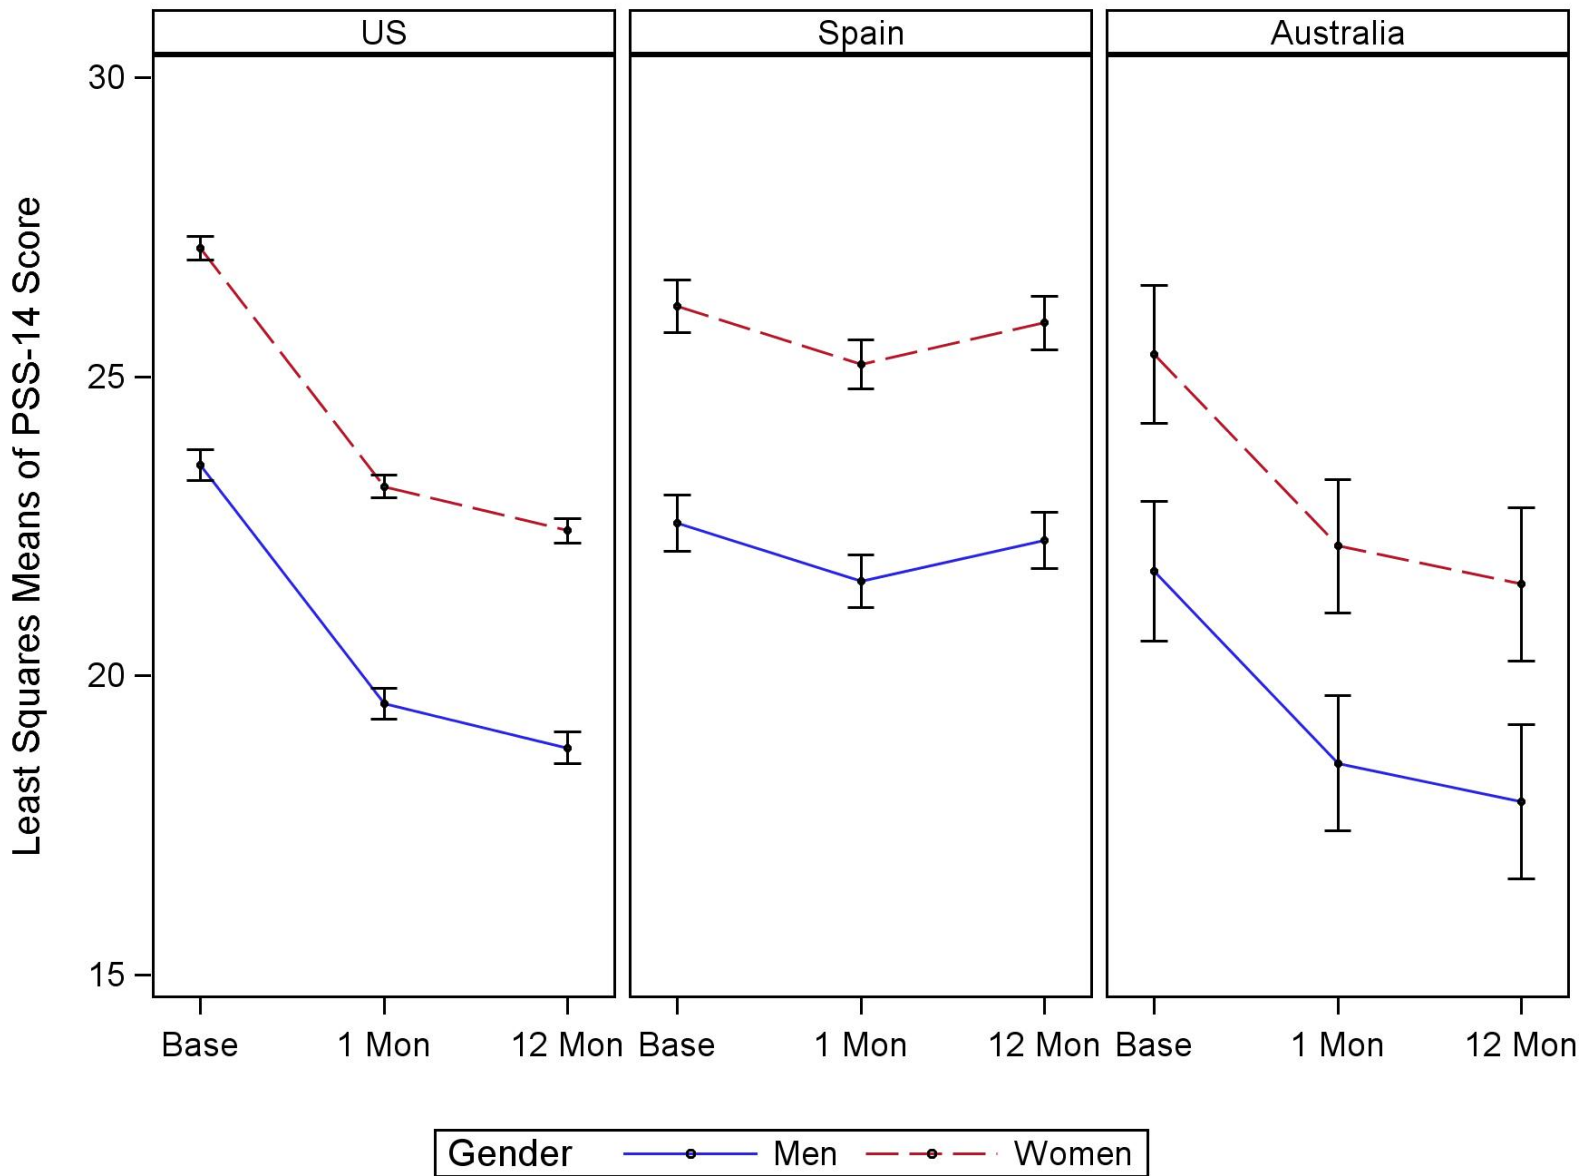

**Figure S1.** Sex differences in perceived stress scale (PSS)-14 score over time, by country. PSS-14 score range: 0-56 (higher score indicates greater stress). The top and bottom error bars reflect one standard deviation above and below the corresponding mean PSS-14 score, respectively. Figure was generated based on Model 1 in Table 2.

**Table S1. Results from multivariable regression model for perceived stress scale (PSS), after adjustment for all explanatory variables**

|                                             | Coefficient Estimate | 95% Confidence Interval |       | P value |
|---------------------------------------------|----------------------|-------------------------|-------|---------|
|                                             |                      | lower                   | Upper |         |
| Intercept                                   | 21.55                | 19.98                   | 23.12 | <.001   |
| Female (versus male)                        | 1.74                 | 1.32                    | 2.16  | <.001   |
| Time                                        |                      |                         |       |         |
| Baseline                                    | Reference            |                         |       |         |
| 1 month                                     | -2.00                | -2.33                   | -1.66 | <.001   |
| 12 month                                    | -2.36                | -2.73                   | -2.00 | <.001   |
| Age                                         |                      |                         |       |         |
| 18-34                                       | 1.59                 | 0.65                    | 2.53  | <.001   |
| 35-44                                       | 0.43                 | -0.02                   | 0.88  | 0.06    |
| 45-55                                       | Reference            |                         |       |         |
| Race                                        |                      |                         |       |         |
| White                                       | Reference            |                         |       |         |
| Black                                       | -0.87                | -1.43                   | -0.30 | 0.003   |
| Other                                       | -0.47                | -1.29                   | 0.35  | 0.26    |
| Education                                   |                      |                         |       |         |
| Less than high school                       | Reference            |                         |       |         |
| High school                                 | 0.48                 | -0.57                   | 1.53  | 0.37    |
| More than high school                       | -0.05                | -1.11                   | 1.00  | 0.92    |
| Marital status                              |                      |                         |       |         |
| Married/living with a partner as if married | Reference            |                         |       |         |
| Not married                                 | -0.15                | -0.56                   | 0.27  | 0.48    |
| Number of children living in household      |                      |                         |       |         |
| 0                                           | Reference            |                         |       |         |
| 1-2                                         | 0.63                 | 0.22                    | 1.05  | 0.002   |
| ≥ 3                                         | 1.21                 | 0.52                    | 1.89  | <0.001  |
| Finances at the end of the month            |                      |                         |       |         |
| Some money left over                        | Reference            |                         |       |         |
| Just enough to make ends meet               | 1.58                 | 1.10                    | 2.06  | <.001   |
| Not enough to make ends meet                | 3.63                 | 3.08                    | 4.19  | <.001   |
| Employment status                           |                      |                         |       |         |
| Not working for pay                         | -0.02                | -0.54                   | 0.50  | 0.95    |
| Working part time (<35 hours)               | 0.20                 | -0.40                   | 0.80  | 0.51    |
| Working full time (35-55 hours)             | Reference            |                         |       |         |
| Working full time (>55 hours)               | 0.88                 | 0.07                    | 1.70  | 0.03    |
| Number of comorbid conditions               | 0.07                 | -0.09                   | 0.23  | 0.37    |

|                                           | Coefficient Estimate | 95% Confidence Interval |       | P value |
|-------------------------------------------|----------------------|-------------------------|-------|---------|
|                                           |                      | lower                   | Upper |         |
| <b>AMI severity</b>                       |                      |                         |       |         |
| STEMI                                     | 0.07                 | -0.32                   | 0.47  | 0.72    |
| Cardiogenic shock upon hospital admission | -0.36                | -2.74                   | 2.03  | 0.77    |
| Ejection Fraction <40%                    | -0.23                | -0.86                   | 0.41  | 0.49    |
| GRACE risk score>99                       | -0.05                | -0.78                   | 0.68  | 0.89    |
| Hemodynamic instability                   | -0.36                | -1.05                   | 0.33  | 0.31    |
| Present > 6 hours after symptom onset     | -0.18                | -0.57                   | 0.22  | 0.37    |
| Length of hospital stay, in days          | 0.05                 | 0.01                    | 0.10  | 0.03    |
| SAQ angina frequency                      | -0.02                | -0.03                   | -0.01 | <.001   |
| SAQ angina-related physical limitation    | -0.03                | -0.04                   | -0.02 | <.001   |
| INTERHEART stressful life events scale    | 1.18                 | 1.05                    | 1.30  | <.001   |
| Low social support (based on ESSI)        | 2.89                 | 2.47                    | 3.30  | <.001   |
| Depression (based on PHQ)                 | 6.97                 | 6.57                    | 7.38  | <.001   |
| <b>Country</b>                            |                      |                         |       |         |
| United States                             | Reference            |                         |       |         |
| Spain                                     | -0.44                | -1.25                   | 0.37  | 0.29    |
| Australia                                 | 0.53                 | -1.32                   | 2.39  | 0.57    |
| <b>Interaction</b>                        |                      |                         |       |         |
| Spain*1 month                             | 2.79                 | 1.95                    | 3.62  | <.001   |
| Spain*12month                             | 3.07                 | 2.18                    | 3.96  | <.001   |
| Australia*1 month                         | -0.21                | -2.35                   | 1.92  | 0.85    |
| Australia*12month                         | -0.82                | -3.21                   | 1.56  | 0.50    |

AMI = acute myocardial infarction; ESSI = Enhancing Recovery in Coronary Heart Disease Patients (ENRICH) Social Support Inventory; GRACE = Global Registry of Acute Coronary Events; PHQ-9 = Patient Health Questionnaire; SAQ = Seattle Angina Questionnaire; STEMI = ST-segment-elevation myocardial infarction

**Table S2. Comparison of baseline characteristics between patients who did versus did not have complete data at all 3 interviews.**

| <b>Patient characteristics</b>                    | <b>Did not have complete data at all 3 interviews<sup>a</sup><br/>(n=847)</b> | <b>Had complete data at all 3 interviews<br/>(n=2,662)</b> | <b>P value</b> |
|---------------------------------------------------|-------------------------------------------------------------------------------|------------------------------------------------------------|----------------|
| Age                                               |                                                                               |                                                            | <.001          |
| 18-34                                             | 56 (6.6%)                                                                     | 104 (3.9%)                                                 |                |
| 35-44                                             | 242 (28.6%)                                                                   | 638 (24.0%)                                                |                |
| 45-55                                             | 549 (64.8%)                                                                   | 1920 (72.1%)                                               |                |
| Race                                              |                                                                               |                                                            | <.001          |
| White                                             | 617 (72.9%)                                                                   | 2149 (80.9%)                                               |                |
| Black                                             | 167 (19.7%)                                                                   | 363 (13.7%)                                                |                |
| Other                                             | 62 (7.3%)                                                                     | 145 (5.5%)                                                 |                |
| Education                                         |                                                                               |                                                            | <.001          |
| Less than high school                             | 36 (4.3%)                                                                     | 147 (5.6%)                                                 |                |
| High school                                       | 405 (48.8%)                                                                   | 1025 (39.2%)                                               |                |
| More than high school                             | 389 (46.9%)                                                                   | 1444 (55.2%)                                               |                |
| Marital status                                    |                                                                               |                                                            | <.001          |
| Married/living with a partner as if married       | 421 (49.8%)                                                                   | 1617 (61.0%)                                               |                |
| Not married                                       | 424 (50.2%)                                                                   | 1034 (39.0%)                                               |                |
| Number of children living in household            |                                                                               |                                                            | .049           |
| 0                                                 | 390 (46.4%)                                                                   | 1194 (45.0%)                                               |                |
| 1-2                                               | 351 (41.8%)                                                                   | 1209 (45.6%)                                               |                |
| ≥3                                                | 99 (11.8%)                                                                    | 249 (9.4%)                                                 |                |
| Finances at the end of the month                  |                                                                               |                                                            | <.001          |
| Some money left over                              | 175 (21.0%)                                                                   | 878 (33.2%)                                                |                |
| Just enough to make ends meet                     | 311 (37.3%)                                                                   | 993 (37.5%)                                                |                |
| Not enough to make ends meet                      | 347 (41.7%)                                                                   | 774 (29.3%)                                                |                |
| Employment status                                 |                                                                               |                                                            | <.001          |
| Not working for pay                               | 388 (46.5%)                                                                   | 928 (35.7%)                                                |                |
| Working part time (<35 hours)                     | 104 (12.5%)                                                                   | 360 (13.8%)                                                |                |
| Working full time (35-55 hours)                   | 297 (35.6%)                                                                   | 1117 (42.9%)                                               |                |
| Working full time (>55 hours)                     | 45 (5.4%)                                                                     | 198 (7.6%)                                                 |                |
| Number of comorbid conditions, mean ± SD          | 2.6 ± 1.4                                                                     | 2.4 ± 1.3                                                  | <.001          |
| SAQ angina frequency, mean ± SD                   | 82.7 ± 21.4                                                                   | 84.5 ± 20.0                                                | .030           |
| SAQ angina-related physical limitation, mean ± SD | 77.7 ± 27.9                                                                   | 82.6 ± 24.4                                                | <.001          |
| INTERHEART stressful life events, mean ± SD       | 1.7 ± 1.5                                                                     | 1.6 ± 1.3                                                  | .058           |
| Low social support (based on ESSI)                | 208 (25.0%)                                                                   | 528 (20.0%)                                                | .002           |
| Depression (based on PHQ-9)                       | 306 (37.6%)                                                                   | 819 (31.7%)                                                | .002           |

| <b>Patient characteristics</b>              | <b>Did not have complete data at all 3 interviews<sup>a</sup><br/>(n=847)</b> | <b>Had complete data at all 3 interviews<br/>(n=2,662)</b> | <b>P value</b> |
|---------------------------------------------|-------------------------------------------------------------------------------|------------------------------------------------------------|----------------|
| AMI severity                                |                                                                               |                                                            |                |
| STEMI                                       | 440 (51.9%)                                                                   | 1385 (52.0%)                                               | .97            |
| Cardiogenic shock upon hospital admission   | 5 (0.6%)                                                                      | 16 (0.6%)                                                  | .97            |
| Ejection fraction <40%                      | 94 (11.5%)                                                                    | 269 (10.4%)                                                | .39            |
| GRACE risk score >99                        | 79 (9.6%)                                                                     | 209 (8.0%)                                                 | .14            |
| Hemodynamic instability                     | 77 (9.1%)                                                                     | 224 (8.4%)                                                 | .54            |
| Present >6 hours after symptom onset        | 374 (44.3%)                                                                   | 1091 (41.1%)                                               | .10            |
| Length of hospital stay, in days, mean ± SD | 4.9 ± 4.7                                                                     | 4.6 ± 4.4                                                  | .12            |
| Country                                     |                                                                               |                                                            | .004           |
| United States                               | 721 (85.1%)                                                                   | 2207 (82.9%)                                               |                |
| Spain                                       | 101 (11.9%)                                                                   | 410 (15.4%)                                                |                |
| Australia                                   | 25 (3.0%)                                                                     | 45 (1.7%)                                                  |                |

Differences in characteristics between women and men were assessed using chi-square tests for categorical variables and student's t tests for continuous variables.

AMI = acute myocardial infarction; ESSI = Enhancing Recovery in Coronary Heart Disease Patients (ENRICHD) Social Support Inventory; GRACE = Global Registry of Acute Coronary Events; PHQ-9 = Patient Health Questionnaire; SAQ = Seattle Angina Questionnaire; SD = standard deviation; STEMI = ST-segment-elevation myocardial infarction

<sup>a</sup> Patients who missed 1 or more follow-up interviews or did not have sufficient data on the 14-item perceived stress scale (PSS-14) (i.e., missing more than 3 of the 14 items) at 1 or more follow-up interviews were considered as not having complete data at all 3 interviews.
